# Supplementary figures and images for: Estimating the near-surface permafrost-carbon feedback on global warming
Source: Copernicus journal article supplement (doi:10.5194/bg-9-649-2012), 2012-02-03

# Driving Forces for CMIP5: All Anthro. Forcings

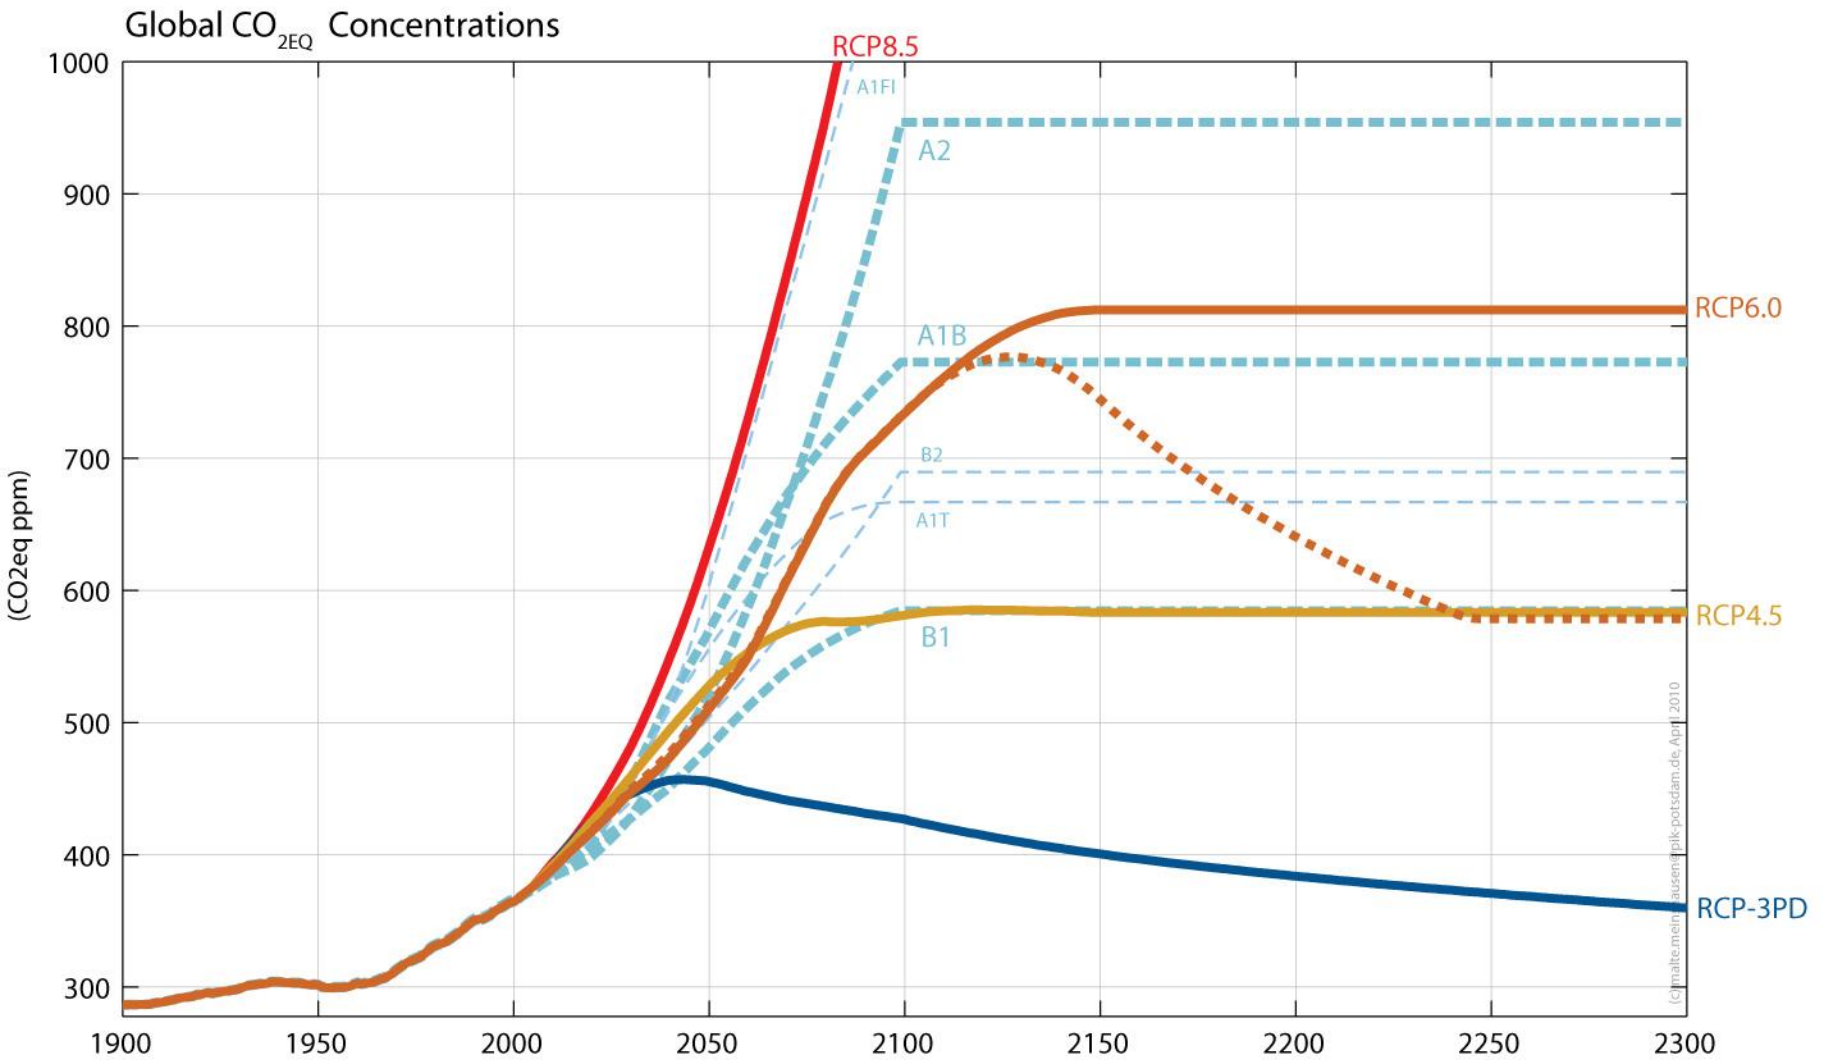

Supplement: Supplementary file 1 [file bg-9-649-2012-supplement.pdf]
